# Supplementary material for: Genotyping-by-sequencing based QTL mapping for rice grain yield under reproductive stage drought stress tolerance
Source: PubMed Central journal article supplement (PMC6778106; doi:10.1038/s41598-019-50880-z), 2019-10-04
Supplement: 41598_2019_50880_MOESM1_ESM.pdf [file 41598_2019_50880_MOESM1_ESM.pdf]

1 **Supplementary Information**

2

3 **Title**

4

5 **Genotyping-by-sequencing based QTL mapping for rice grain yield under reproductive stage drought stress**  
6 **tolerance**

7

8 Shailesh Yadav<sup>1</sup>, Nitika Sandhu<sup>1,2</sup>, Vikas Kumar Singh<sup>3</sup>, Margaret Catolos<sup>1</sup> and Arvind Kumar<sup>1,4\*</sup>

9 <sup>1</sup> Rice Breeding Platform, International Rice Research Institute, DAPO Box 7777, Metro Manila, Philippines

10 <sup>2</sup> Punjab Agricultural University, Ludhiana, Punjab, India

11 <sup>3</sup> International Rice Research Institute, South Asia Hub, ICRISAT, Patancheru, Hyderabad, India

12 <sup>4</sup> IRRI South Asia Regional Centre (ISARC), Varanasi, Uttar Pradesh, 221106, India

13

14

15

16 **\*Author for Correspondence**

17

18

19 **Arvind Kumar**

20 Director

21 IRRI South Asia Regional Centre (ISARC)

22 NSRTC Campus, G.T. Road, Collectry Farm

23 P.O. Industrial Estate, Varanasi-221006, Uttar Pradesh, India

24 Telephone: 0091-542-2518900

25 Email: [a.kumar@irri.org](mailto:a.kumar@irri.org)

26 ORCID ID: 0000-0002-5488-9410

27

**Figure S1:** A comparative map showing narrowed down genomic region of previously identified *qDTY<sub>1.1</sub>* using high density linkage maps  
 a). *qDTY<sub>1.1</sub>* with undesirable linkages of early flowering and tallness (Vikram et al. 2011) located in genomic region of 36.75-40.70 Mb with QTL size of 3.95 Mb  
 b). *qDTY<sub>1.1</sub>* (present study) located nearly to 40 Mb genomic region with QTL size of 1.2 Mb size and free from undesirable linkages

28  
29  
30  
31  
32  
33  
34  
35  
36  
37  
38  
39  
40  
41  
42

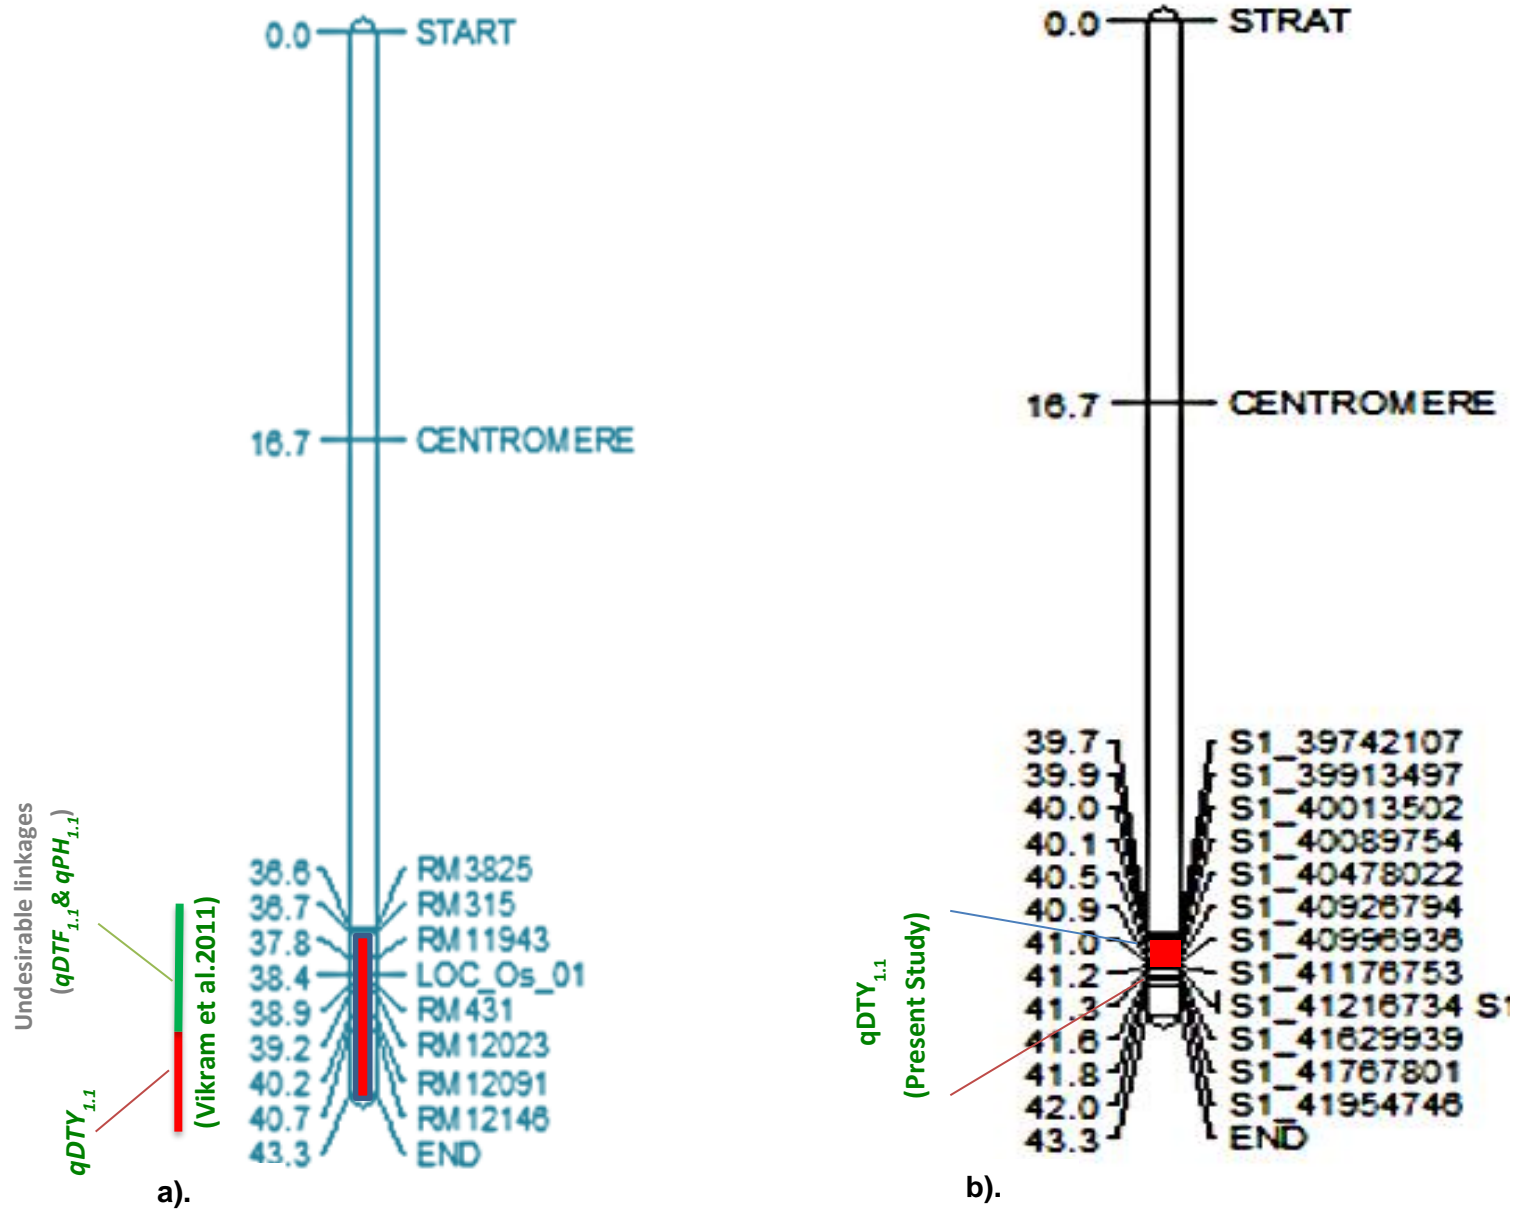

43 Supplementary Tables

44

45 **Detailed Excel file has been attached (Table S1-S9)**

46

47

48 **Table S1.** Summary of analyzed GBS data through TASSEL-GBS pipeline

49

50 **Table S2.** Alignment of reads to reference genome in Swarna\*2/Dular population.

51

52 **Table S3.** Alignment of reads to reference genome in IR11N121\*2/Aus 196.

53

54 **Table S4.** Total SNPs generated in TASSEL GBS pipeline for Swarna\*2/Dular population.

55

56 **Table S5.** Total SNPs generated in TASSEL GBS pipeline for IR11N121\*2/Aus 196 population.

57

58 **Table S6.** Filtered, polymorphic SNPs used in linkage map construction for Swarna\*2/Dular population.

59

60 **Table S7.** Filtered, polymorphic SNPs used in linkage map construction for IR11N121\*2/Aus 196 population.

61

62 **Table S8.** Validation of *qDTY1.1* using flanking markers in 250 lines randomly selected from five mapping populations

63

64 **Table S9.** Results of estimation of QTL effects among + QTL and - QTL lines

65

66

67

68

69
